# Supplementary material for: Metallic-like bonding in plasma-born silicon nanocrystals for nanoscale bandgap engineering
Source: Royal Society of Chemistry journal article supplement (doi:10.1039/c6nr04349f), 2016-01-01
Supplement: c6nr04349f1.pdf [file c6nr04349f1.pdf]

# Supporting Information

## Metallic-like bonding in plasma-born silicon nanocrystals for nanoscale bandgap engineering

Holger Vach<sup>1</sup>, Lena V. Ivanova<sup>2</sup>, Qadir K. Timerghazin<sup>2</sup>,  
Fatme Jardali<sup>1</sup>, Ha-Linh Thi Le<sup>1</sup>

<sup>1</sup>LPICM, CNRS, Ecole Polytechnique, University Paris-Saclay, 91128 Palaiseau, France

<sup>2</sup>Department of Chemistry, Marquette University, Milwaukee, WI-53201, USA

### Abstract

Based on *ab initio* molecular dynamics simulations, we show that small nanoclusters of about 1nm size spontaneously generated in a low-temperature silane plasma do not possess tetrahedral structures, but are ultrastable. Apparently small differences in cluster structure result in substantial modifications in their electric, magnetic, and optical properties without the need for any dopants. Their nontetrahedral geometries notably lead to electron deficient bonds that introduce efficient electron delocalization that strongly resembles the one of a homogeneous electron gas leading to metallic-like bonding within a semiconductor nanocrystal. As a result, pure hydrogenated silicon clusters that form by self-assembly in a plasma reactor possess optical gaps covering most of the solar spectrum from 1.0 eV to 5.2 eV depending simply on their structure and, in turn, on their degree of electron delocalization. This feature makes them ideal candidates for future bandgap engineering not only for photovoltaics, but also for many nano-electronic devices employing nothing else but silicon and hydrogen atoms.

**Cartesian coordinates of the Si<sub>19</sub>H<sub>12</sub> isomer D  
after MP2/6-311++G(d,p) optimization**

Si -0.97871 -0.69367 2.72395  
Si -2.17782 1.13100 1.78639  
Si -0.61780 2.68206 0.93356  
Si 1.51409 2.00584 1.74546  
Si 1.33704 -0.18319 2.63156  
Si -1.32485 -2.55830 1.32264  
Si -3.57038 0.47237 0.00455  
Si -0.73877 2.61278 -1.44062  
Si 2.93131 1.85340 -0.10200  
Si 2.49204 -1.64381 1.18345  
Si 1.25921 1.40464 -1.67144  
Si -1.61599 -1.00391 -2.00989  
Si -2.87936 -1.77085 -0.23711  
Si 0.68319 -2.64132 0.04600  
Si 2.17028 -0.55142 -2.51620  
Si 0.43077 -2.21637 -2.31585  
Si -2.53680 1.18449 -1.99597  
Si 0.10096 -0.38485 -0.50620  
Si 3.52404 -0.39623 -0.50944  
H -1.38754 -0.88628 4.14259  
H -2.99104 1.76157 2.86255  
H -0.92234 4.04849 1.44150  
H 1.97318 2.95953 2.78942  
H 1.89104 -0.19875 4.01389  
H -1.67586 -3.83590 1.98672  
H -5.01377 0.72842 0.22502  
H -0.76928 3.94646 -2.09622

H 3.88748 2.95137 -0.37517

H 3.38993 -2.60644 1.86887

H -3.39099 1.65023 -3.11450

H 4.94823 -0.73343 -0.74300
